# Supplementary material for: A case of swine influenza A(H1N2)v in England, November 2023
Source: PubMed Central journal article supplement (PMC10797662; doi:10.2807/1560-7917.es.2024.29.3.2400002), 2024-01-18
Supplement: 24-00002_ZAMBON_Supplement.pdf [file 24-00002_ZAMBON_Supplement.pdf]

"This supplementary material is hosted by *Eurosurveillance* as supporting information alongside the article [A case of swine influenza (H1N2)v in England, November 2023], on behalf of the authors, who remain responsible for the accuracy and appropriateness of the content. The same standards for ethics, copyright, attributions and permissions as for the article apply. Supplements are not edited by *Eurosurveillance* and the journal is not responsible for the maintenance of any links or email addresses provided therein."

**Supplementary description of sentinel surveillance**

Through this system, 170 general practitioner (GP) practices across England swab patients presenting with new episodes of acute respiratory illness (ARI) (1). The protocol undertaken for winter season 23/24 is available at (2). Samples are routinely analysed for influenza A, B, RSV, hMPV, seasonal coronaviruses (OC43, 229E, HKU1, NL63), SARS CoV 2, adenovirus, rhinovirus and enteroviruses. Influenza A and B positive samples are characterised to determine the virus subtype and where possible, analysed by whole genome sequencing (WGS) to provide insights about circulating virus diversity.

**Supplementary Information 1. GISAID accession numbers of GB swine sequences**

EPI\_ISL\_18543639, EPI\_ISL\_18586964, EPI\_ISL\_18586963, EPI\_ISL\_18586962, EPI\_ISL\_18586961, EPI\_ISL\_18586960, EPI\_ISL\_18586959, EPI\_ISL\_18586958, EPI\_ISL\_18586957, EPI\_ISL\_18586956, EPI\_ISL\_18586955, EPI\_ISL\_18586954, EPI\_ISL\_18586953, EPI\_ISL\_18586952, EPI\_ISL\_18586951, EPI\_ISL\_18586950

**Supplementary Table 1. Nucleotide identity for human gene segments against contemporary swine influenza viruses**

| Segment | Max % ID | Min % ID | Closest swine strain        | EPI ID           |
|---------|----------|----------|-----------------------------|------------------|
| PB2     | 98.76    | 82.49    | A/swine/England/123383/2023 | EPI_ISL_18586956 |
| PB1     | 98.99    | 80.79    | A/swine/England/123045/2023 | EPI_ISL_18543639 |
| PA      | 98.84    | 82.26    | A/swine/England/123383/2023 | EPI_ISL_18586956 |
| HA      | 98.73    | 53.5     | A/swine/England/123383/2023 | EPI_ISL_18586956 |
| NP      | 99.46    | 81.36    | A/swine/England/123383/2023 | EPI_ISL_18586956 |
| NA      | 98.83    | 50.19    | A/swine/England/123383/2023 | EPI_ISL_18586956 |
| MP      | 99.08    | 86.23    | A/swine/England/123045/2023 | EPI_ISL_18543639 |
| NS      | 99.14    | 77.82    | A/swine/England/123383/2023 | EPI_ISL_18586956 |

**Supplementary Table 2. Differences by segment between the human case and designated surrogate virus (A/swine/England/123045/2023)**

| Segment | List of mutations |
|---------|-------------------|
|---------|-------------------|

|           |                                                                                         |
|-----------|-----------------------------------------------------------------------------------------|
| Seg 1 PB2 | K70R, N102X, G103X, G590S, I649V, F694X, L695S, I696X                                   |
| Seg 2 PB1 | V113I, Y431H, N642S                                                                     |
| Seg 3 PA  | K196R, M261L, V379I, T528S, I542V, N614S                                                |
| Seg 4 HA  | Y10C, Q68H, F112L, M133I, K158E, S159R, Y278F, I289M, I341V, V362I, H370Q, S468G, T511N |
| Seg 5 NP  | No amino acid substitutions                                                             |
| Seg 6 NA  | Y42C, S43G, L58V, I71T, K77N, Y155H, G286S, I302V, D346N, L372M, I418T                  |
| Seg 7 MP  | H26Q, A227T                                                                             |
| Seg 8 NS  | C60F, G71E, S91T, K104M                                                                 |

**Supplementary Table 3.** To assess potential protection from the current northern hemisphere 2023-24 vaccine, a Haemagglutination Inhibition (HAI) assay was performed with a small panel of paired pre-and post-vaccination samples from Crick volunteers receiving the 2023-24 egg-based vaccine. Egg-propagated IVR-238 A/Victoria/4897/2022 is representative of the H1N1pdm09 component of the 2023/24 vaccine, whereas cell-propagated A/swine/England/045393/2022 is a representative of the 1B.1.1 clade which the H1N2v. HAI carried out using 0.7% Turkey RBC.

| Sample | Crick ID | A/swine/England/<br>045393/2022 | IVR-238<br>A/Victoria/4897/2022 |
|--------|----------|---------------------------------|---------------------------------|
| pre    | 44       | <20                             | 160                             |
| post   | 44       | <20                             | 1280                            |
| pre    | 50       | <20                             | 1280                            |
| post   | 50       | <20                             | 1280                            |
| pre    | 61       | <20                             | 1280                            |
| post   | 61       | <20                             | 1280                            |
| pre    | 82       | <20                             | 1280                            |
| post   | 82       | <20                             | 1280                            |
| pre    | 99       | <20                             | 1280                            |
| post   | 99       | <20                             | 1280                            |
| pre    | 140      | <20                             | 1280                            |
| post   | 140      | <20                             | 1280                            |
| pre    | 147      | <20                             | 160                             |
| post   | 147      | <20                             | 320                             |
| pre    | 148      | <20                             | 80                              |
| post   | 148      | <20                             | 160                             |
| pre    | 150      | 40                              | 80                              |
| post   | 150      | 40                              | 160                             |
| pre    | 151      | <20                             | 40                              |
| post   | 151      | <20                             | 160                             |

|                   |     |     |      |
|-------------------|-----|-----|------|
| pre               | 158 | <20 | <20  |
| post              | 158 | <20 | <20  |
| pre               | 166 | <20 | 160  |
| post              | 166 | <20 | 160  |
| pre               | 172 | <20 | 40   |
| post              | 172 | <20 | 160  |
| pre               | 179 | <20 | 40   |
| post              | 179 | <20 | 160  |
| pre               | 183 | <20 | 160  |
| post              | 183 | <20 | 160  |
| pre               | 187 | <20 | 160  |
| post              | 187 | <20 | <20  |
| pre               | 190 | 40  | 320  |
| post              | 190 | 40  | 640  |
| pre               | 199 | <20 | 320  |
| post              | 199 | <20 | 320  |
| pre               | 201 | <20 | <20  |
| post              | 201 | <20 | 160  |
| pre               | 217 | <20 | 80   |
| post              | 217 | <20 | 160  |
| A/Victoria ferret |     | <20 | 1280 |
| A/Swine ferret    |     | 80  | <20  |
